# Supplementary material for: Biomechanical characterization of tissue types in murine dissecting aneurysms based on histology and 4D ultrasound-derived strain
Source: PubMed Central journal article supplement (PMC10511389; doi:10.1007/s10237-023-01759-6), 2023-09-14
Supplement: 10237_2023_1759_MOESM1_ESM.pdf [file 10237_2023_1759_MOESM1_ESM.pdf]

## **Supplemental Data**

of

**Biomechanical Characterization of Tissue Types in Murine Dissecting  
Aneurysms based on Histology and 4D Ultrasound-Derived Strain**

by

Achim Hegner, Hannah L. Cebull, Antonio J. Gamez, Christopher Blase, Craig J. Goergen and  
Andreas Wittek

# 1 Histological images

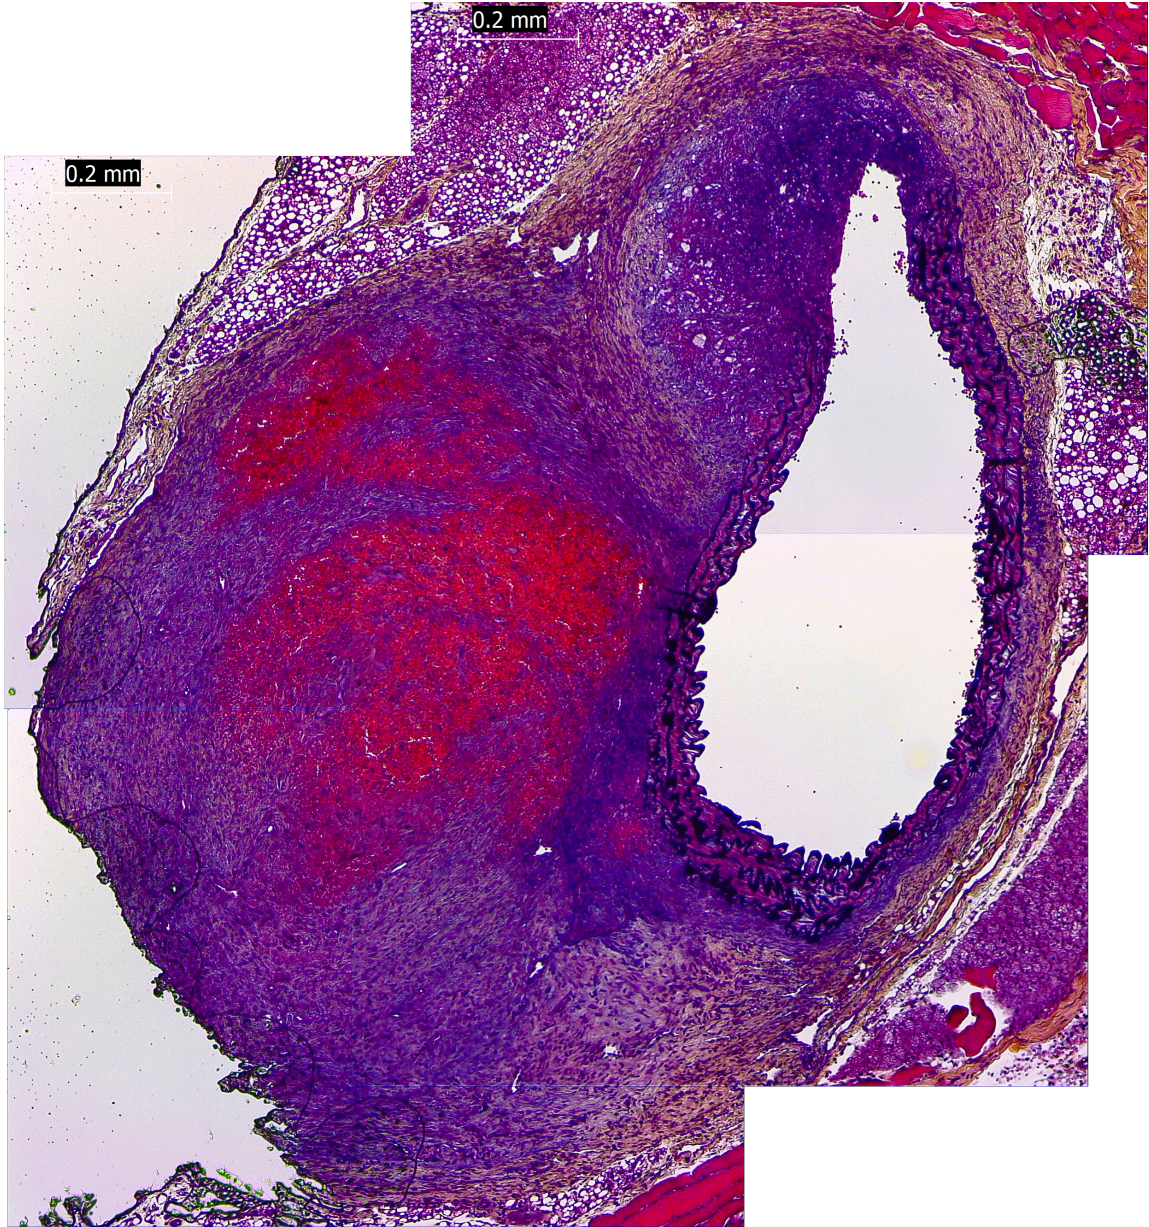

Figure 1.1: M1 Pos3 Histo 10x Movat

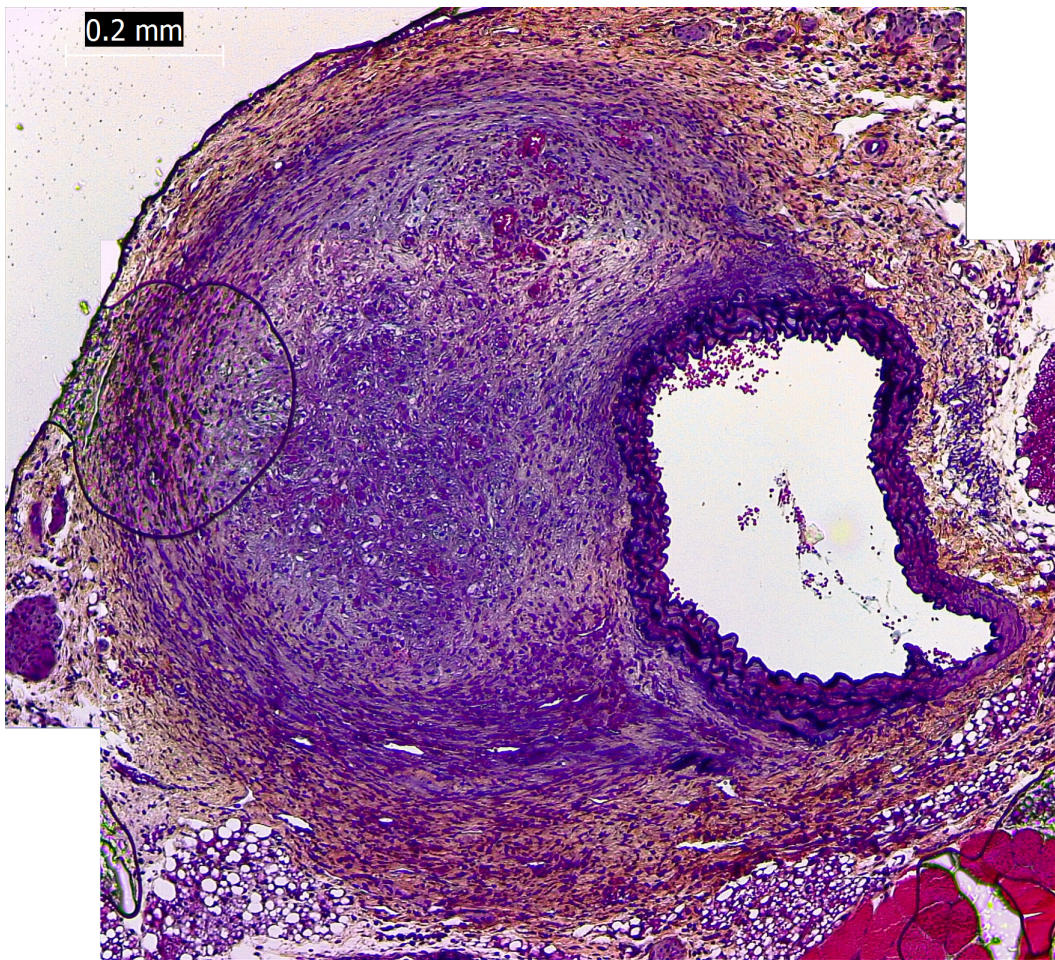

Figure 1.2: M1 Pos4 Histo 10x Movat

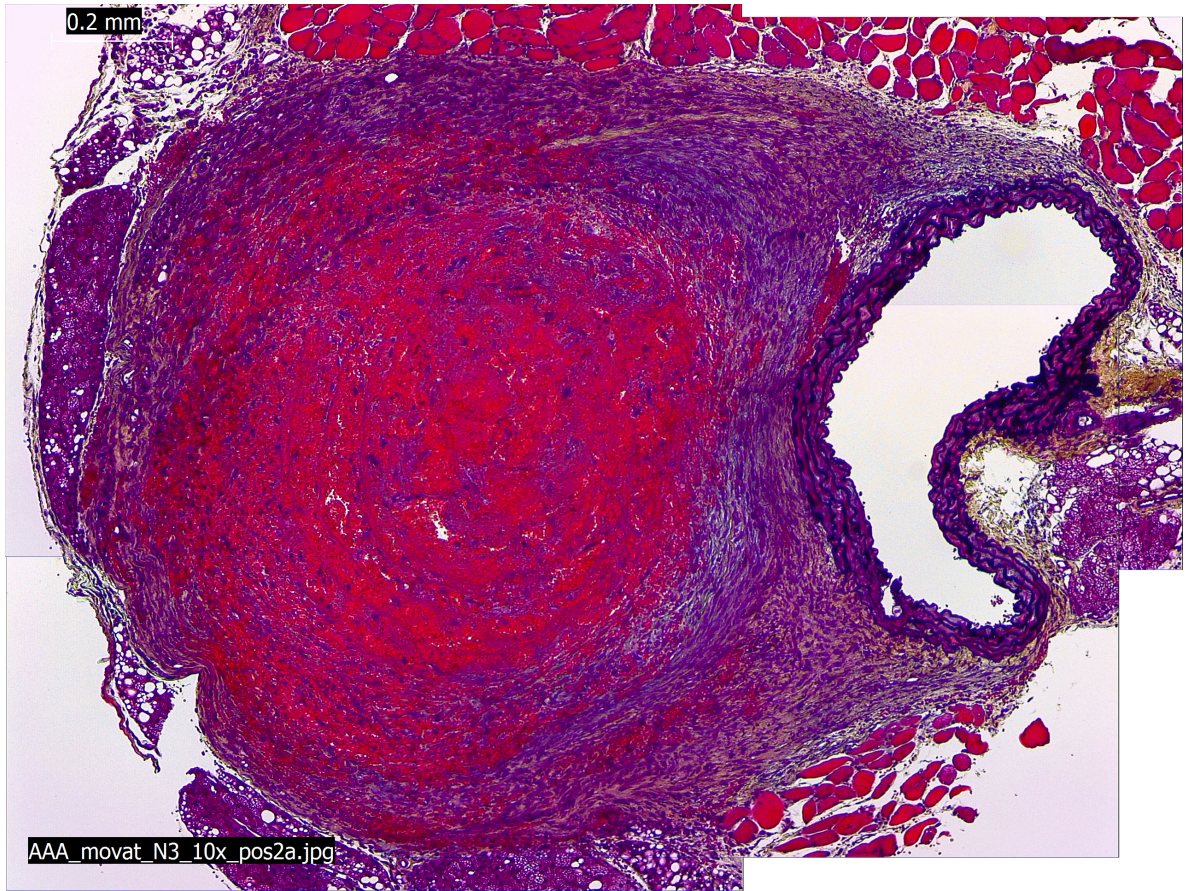

Figure 1.3: M2 Pos2 Histo 10x Movat

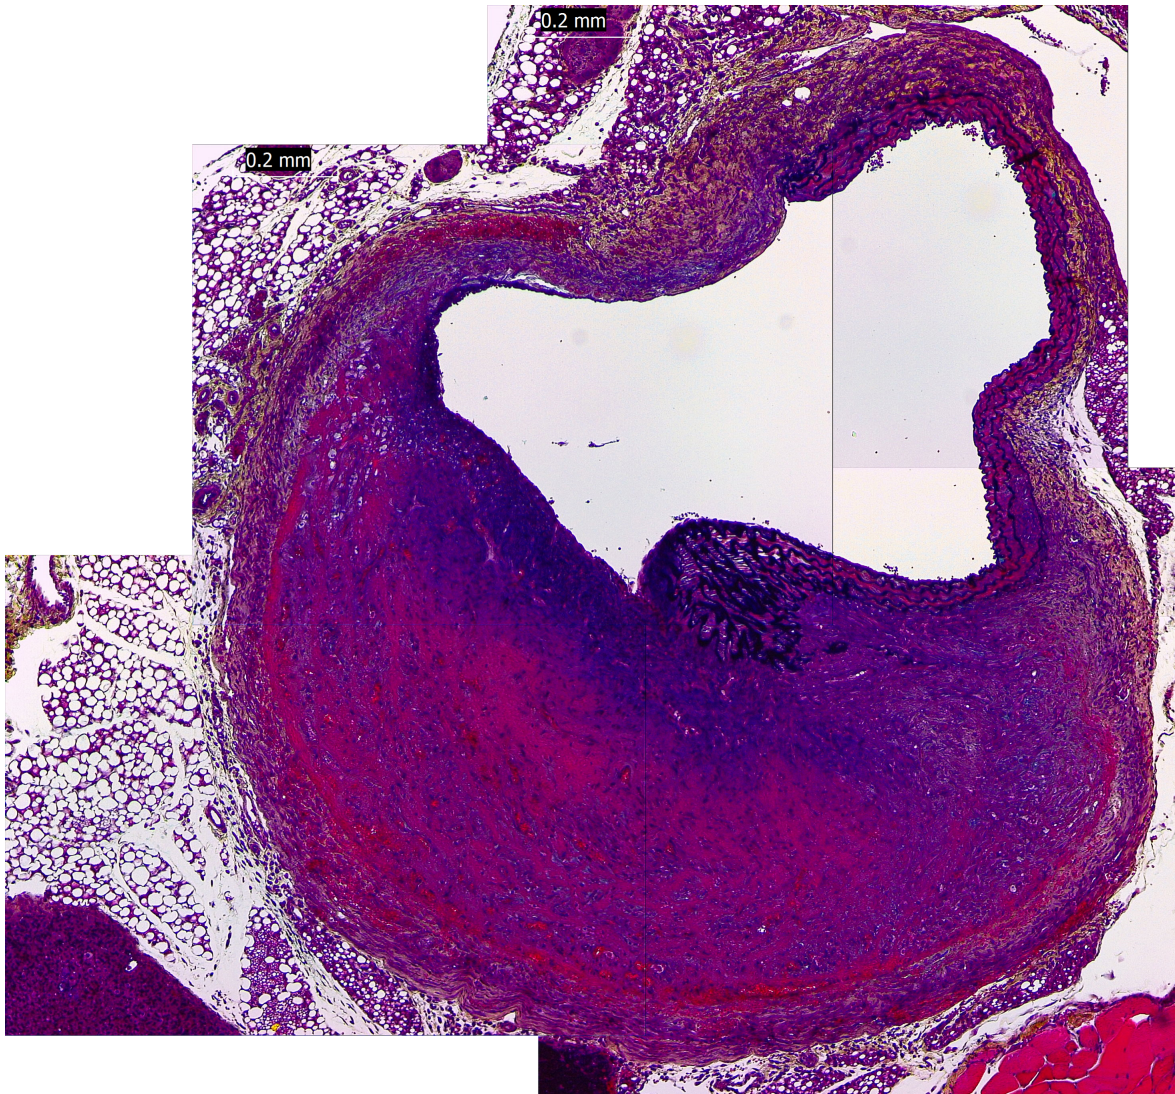

Figure 1.4: M2 Pos3 Histo 10x Movat

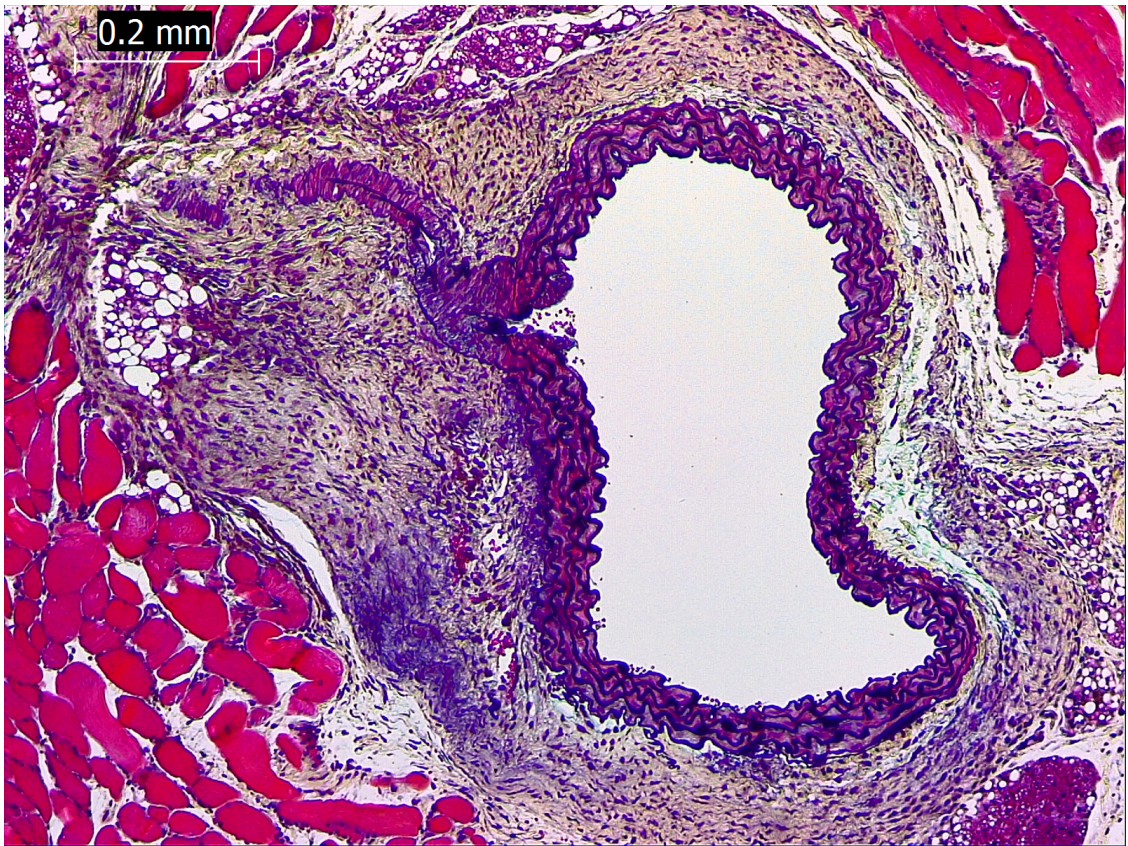

Figure 1.5: M3 Pos2 Histo 10x Movat

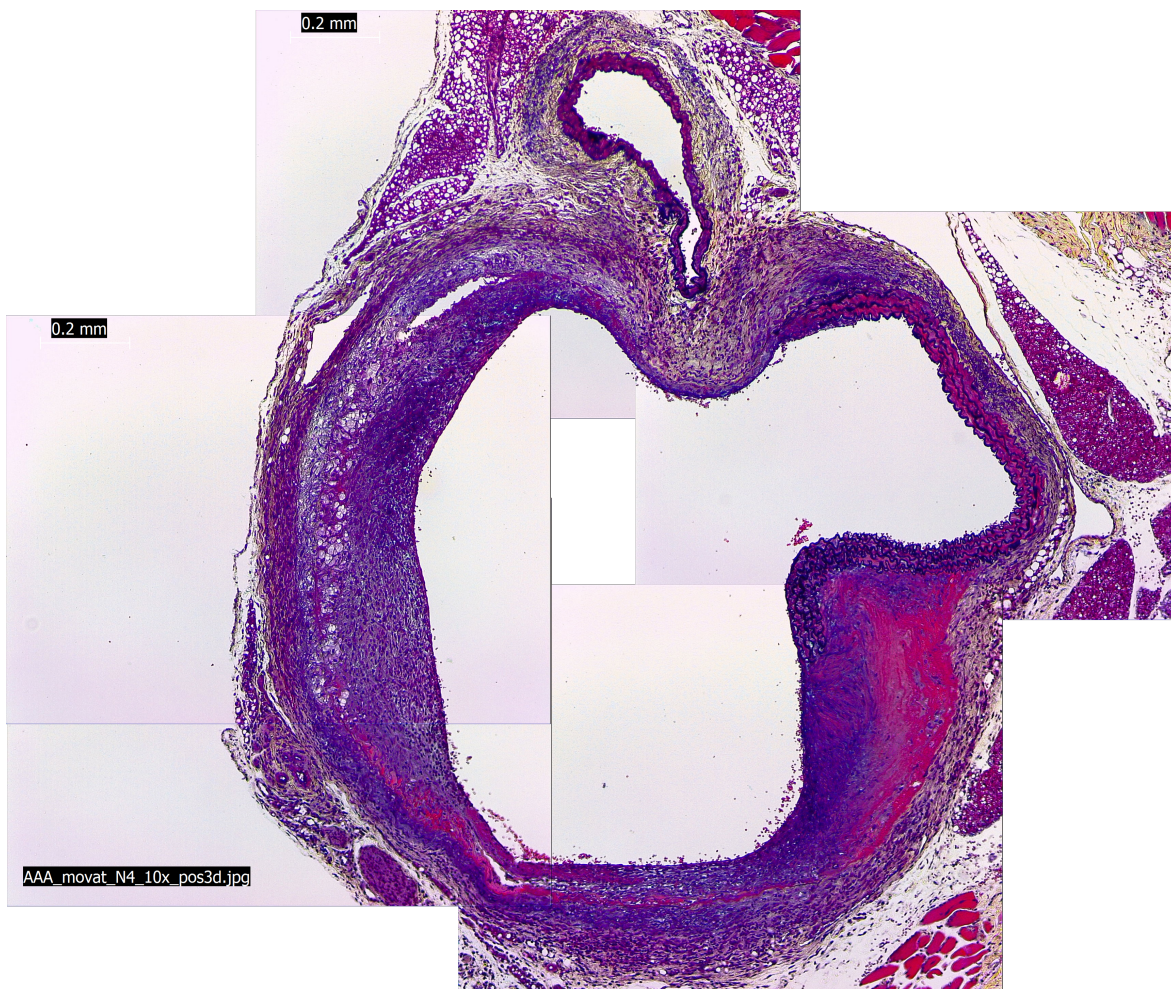

Figure 1.6: M3 Pos3 Histo 10x Movat



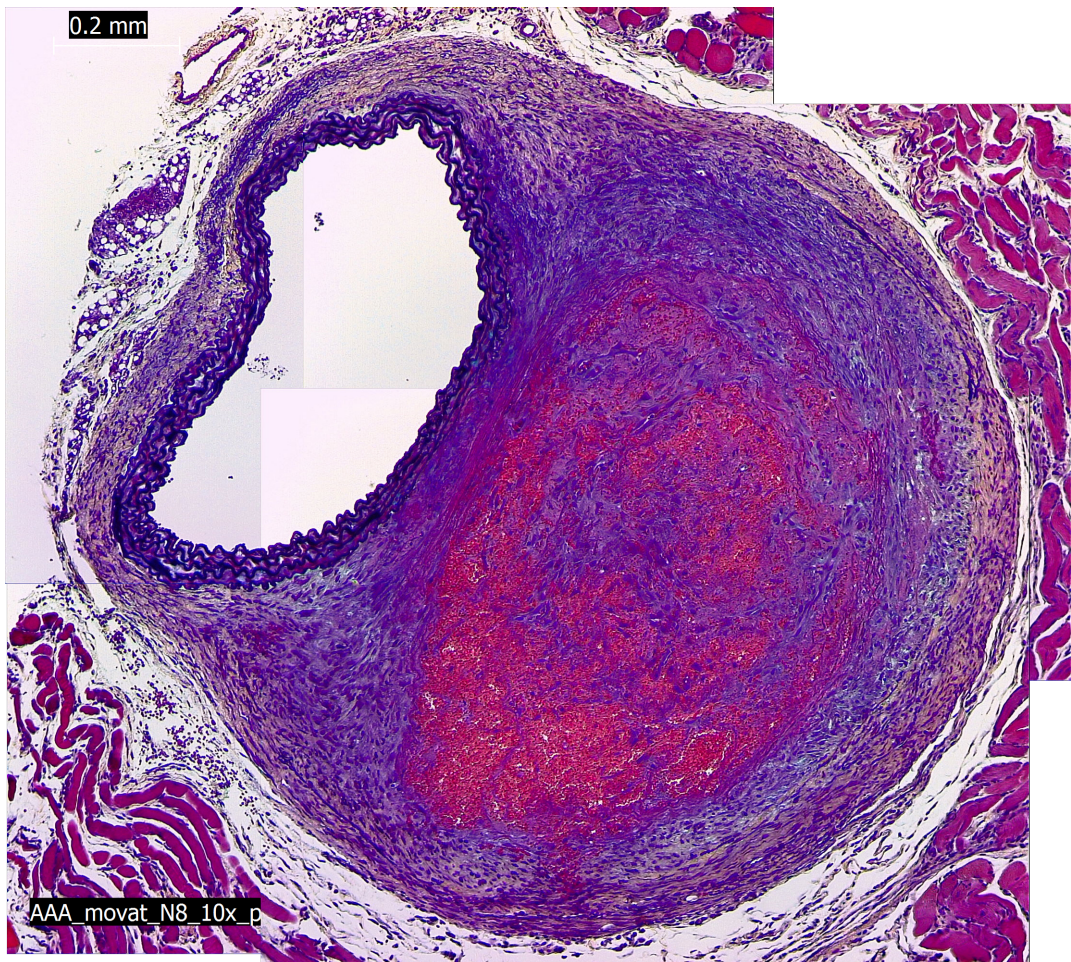

Figure 1.7: M4 Pos1 Histo 10x Movat

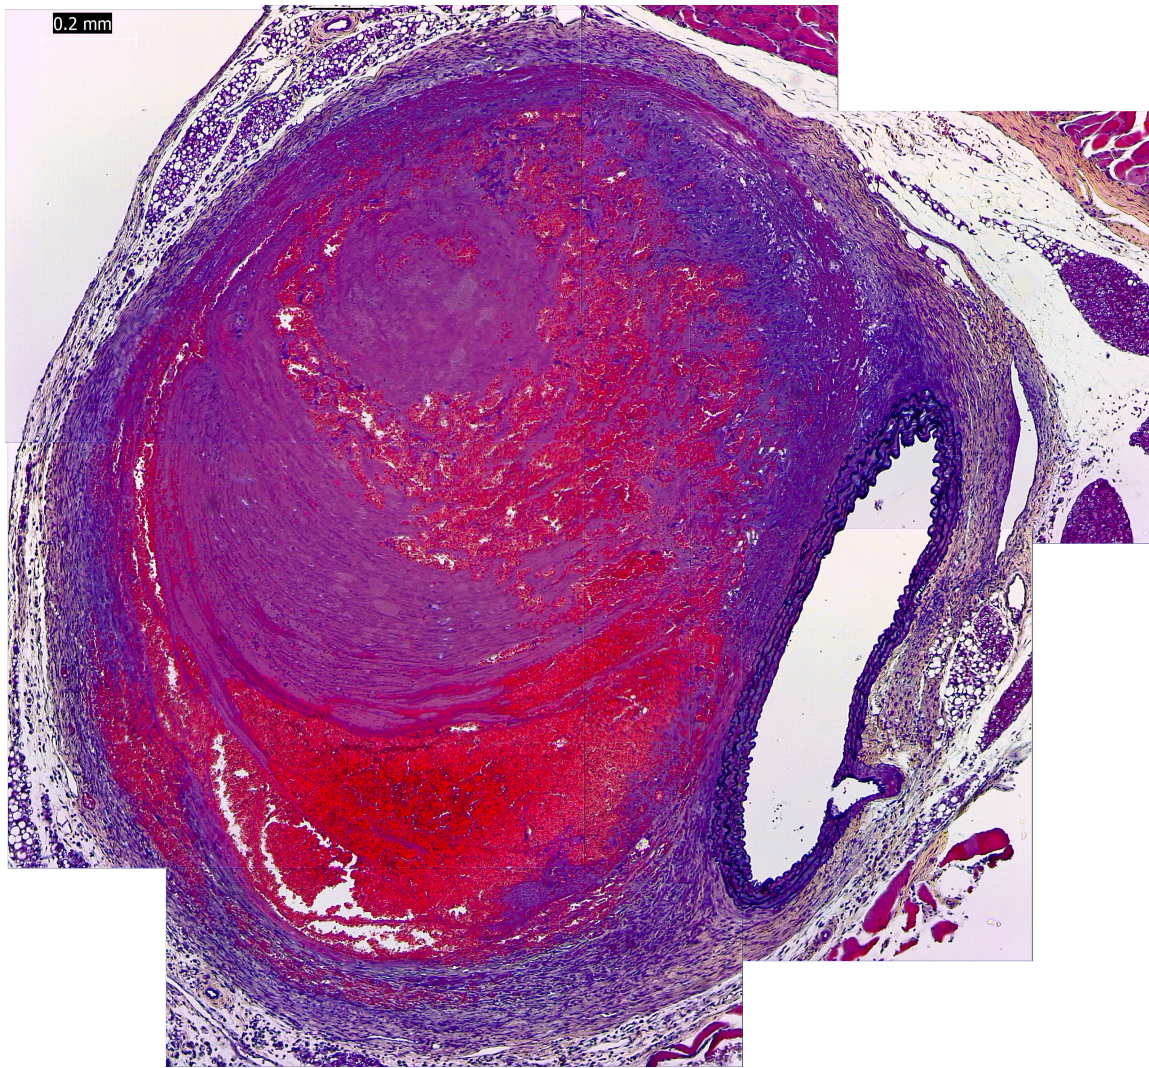

Figure 1.8: M4 Pos2 Histo 10x Movat

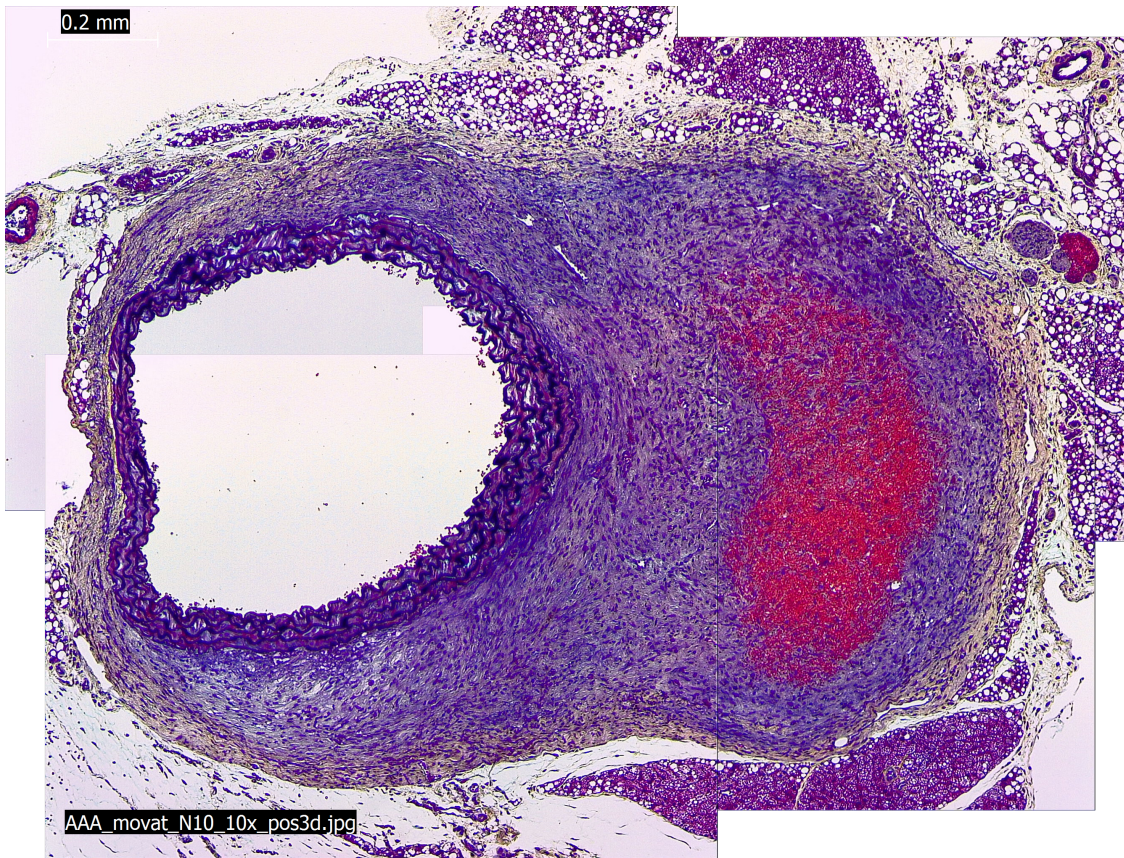

Figure 1.9: M5 Pos3 Histo 10x Movat

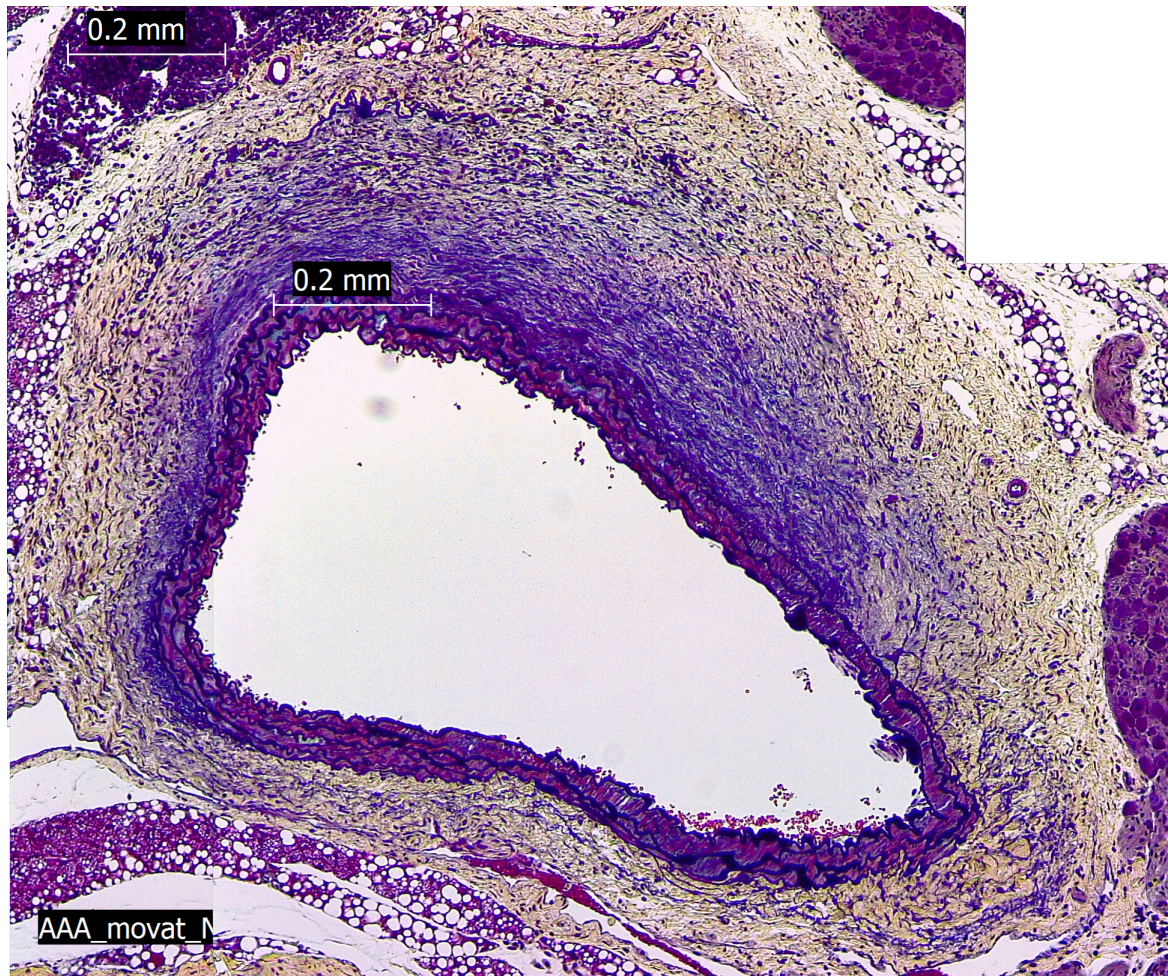

Figure 1.10: M5 Pos4 Histo 10x Movat
